# Supplementary material
Source: publisher figshare collection journal article supplement (https://gsapubs.figshare.com/ndownloader/files/23292887)

**Supplementary figure captions**

Figure DR1. Depth of reflectors estimated from time-versus-depth curves derived from OBS seismic experiments at ODP site 672 and at 14°30'N, 57°30'W. Vertical crosses show the cumulative travel times derived from velocity measurements made on core samples from ODP hole 672A. Diagonal crosses show the cumulative travel times derived from velocity measurements made on core samples from ODP hole 672A, after correction for the in-situ pressure and temperature of the pore water. The limits of picking errors on the two reflectors are plus or minus half the dominant period of the seismic wavelet.

Figure DR2. Age/Depth graph summarizing information on the increase of age with depth at DSDP site 27, as updated from Bader et al. (1970) in this study (see text for details), and the correlation with the red unconformity, marking the onset of a period of rapid basement uplift, and the deeper orange reflector, which is prominent regional marker horizon. The widths of the coloured bars marking each of these two reflectors is equal to the combined uncertainty introduced by error in picking the reflectors and depth conversion with the two time-depth functions illustrated in supplementary figure 1. The time-depth function derived from the area of ODP Site 672, which gives shallower depths, is likely to be more appropriate than that derived from the site at 14° 30' N in a distal turbidite sequence. Green solid line corresponds to a 40 m/Ma accumulation rate (without decompaction). Grey rectangles correspond to DSDP site 27 cored intervals with their biostratigraphically determined age ranges. (The largest rectangle corresponds to species recovered in a center bit sample in between 93 and 141 m, but which is likely to have come from the bottom of this range). The 0.2 Ma error bar is an indication of the error due to the uncertainty in the time/depth conversion. It does not take into account other errors, such as the uncertainty in the sedimentation rate.

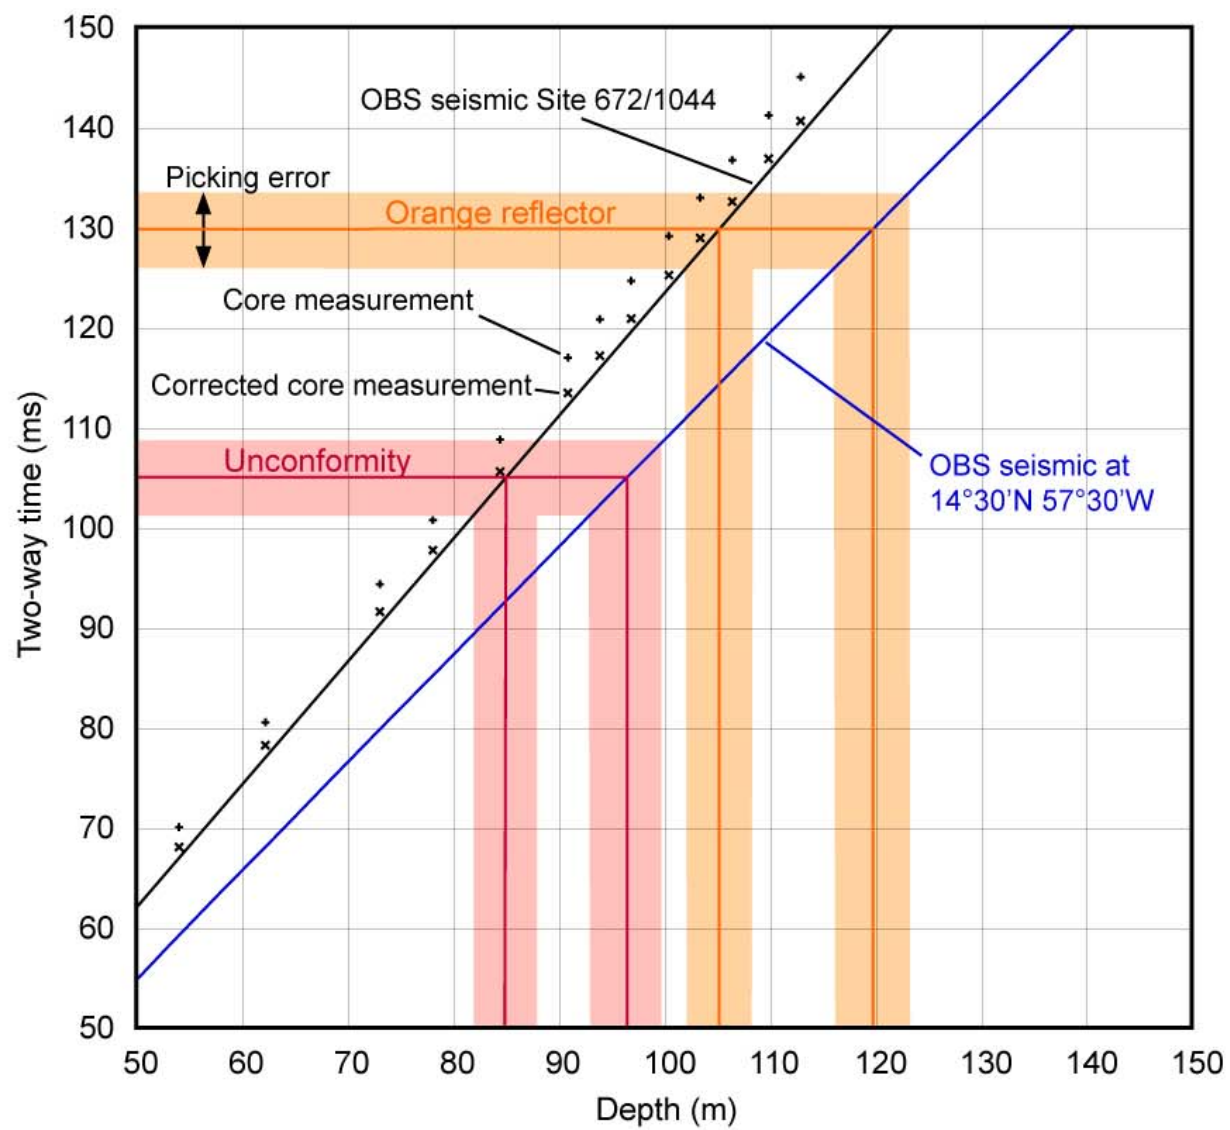

Figure DR1

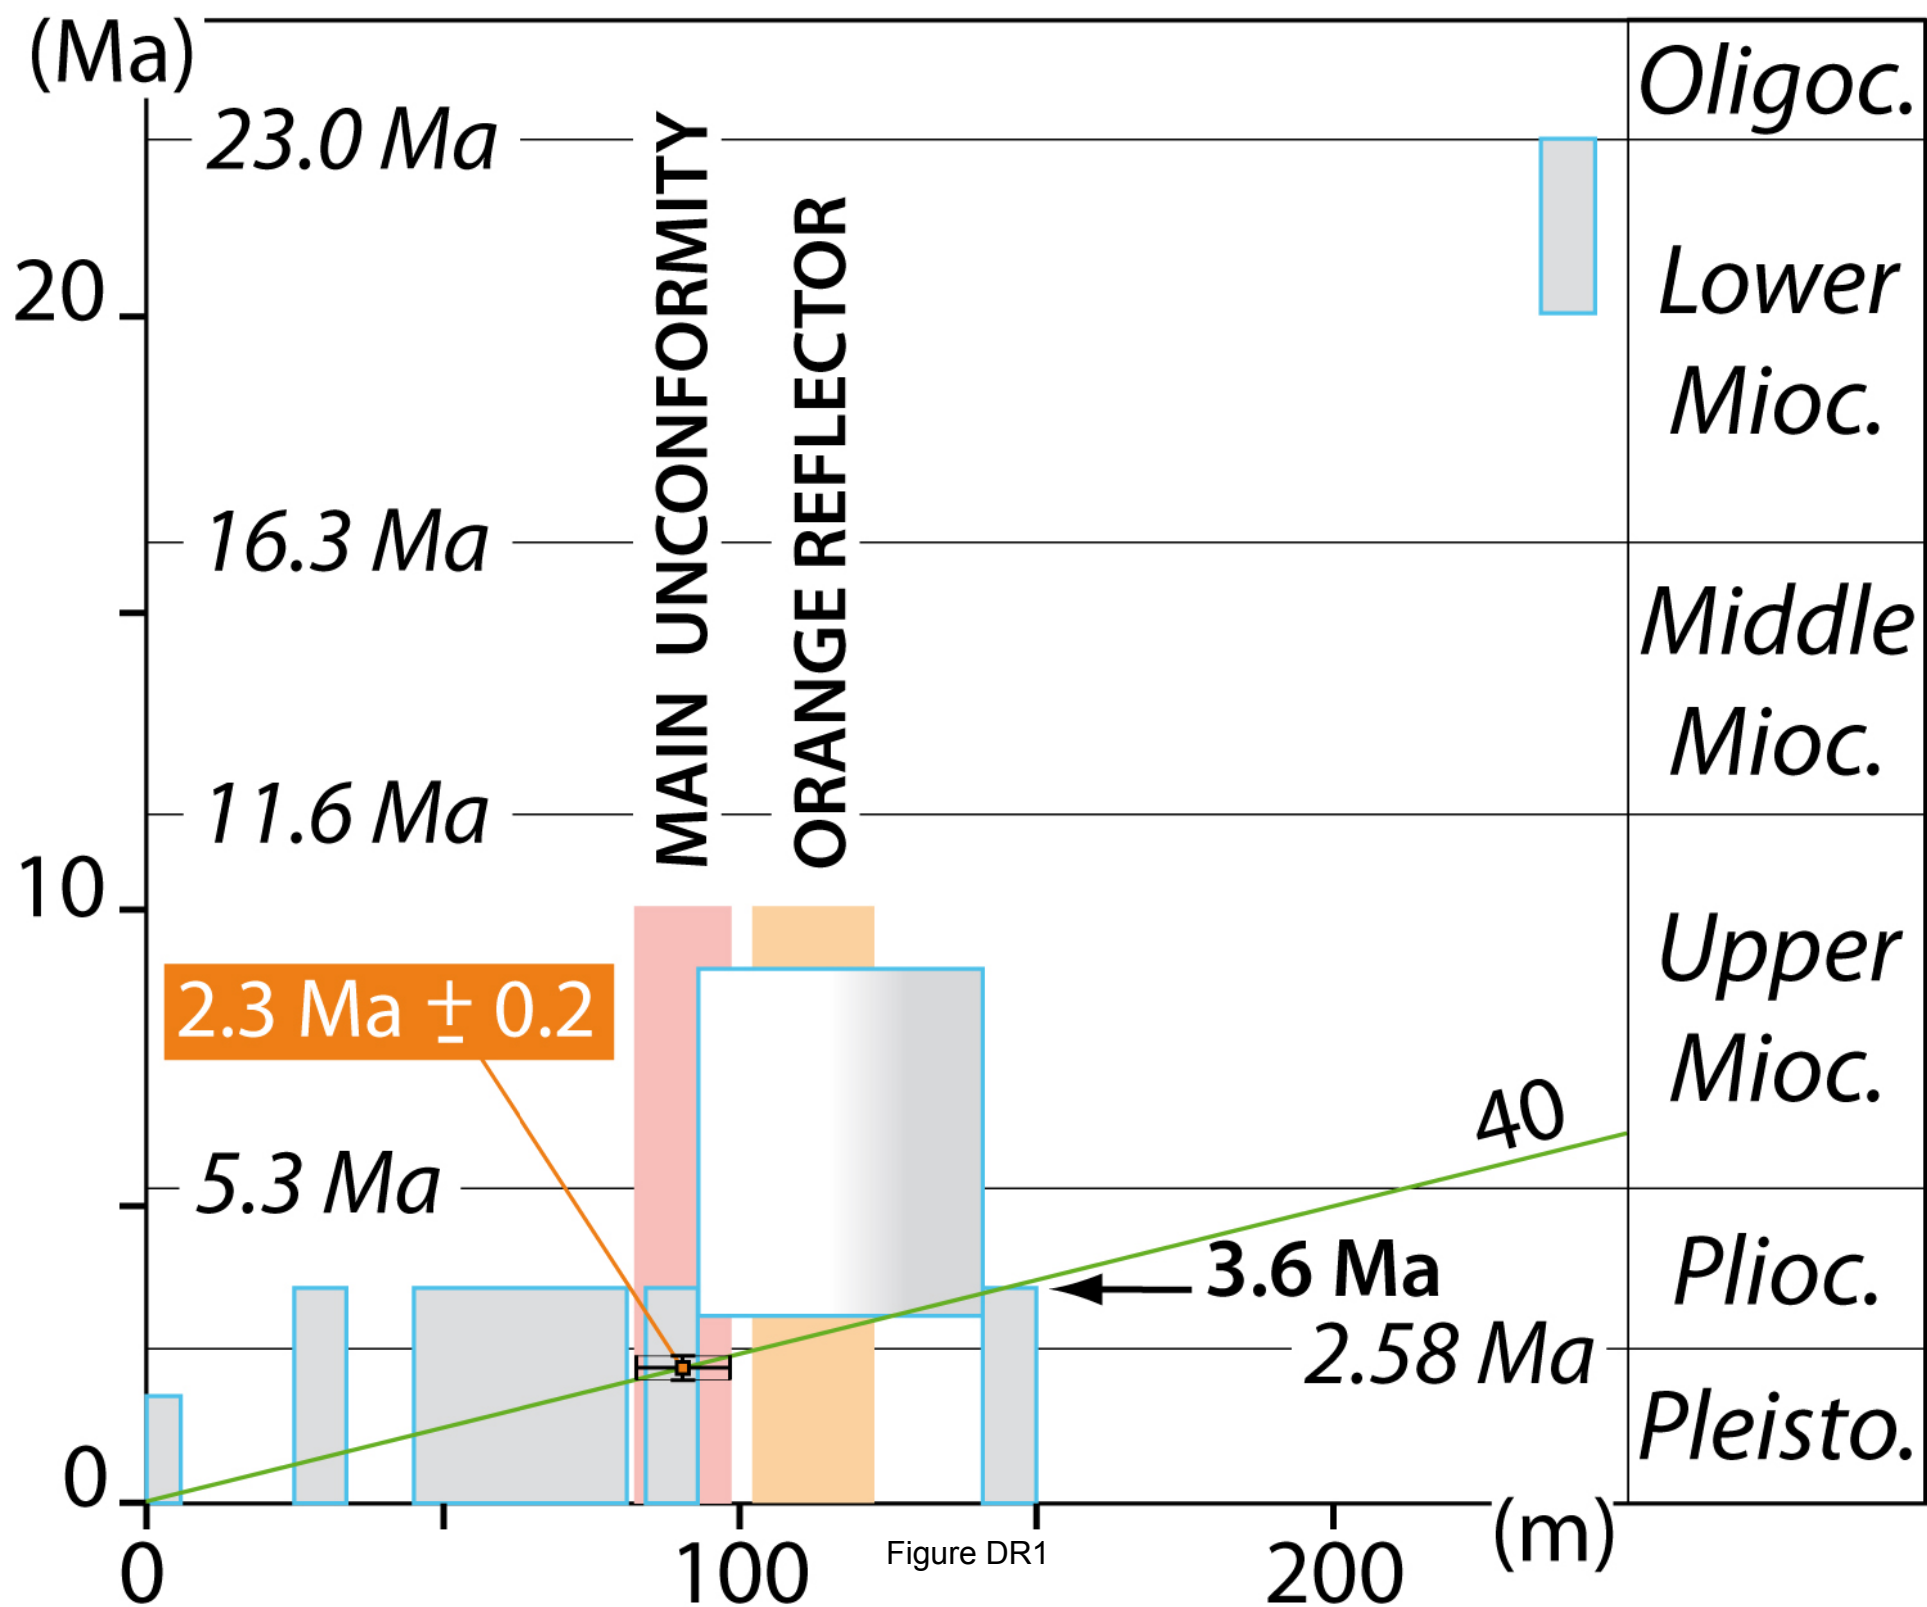

Supplement: Supplementary file 1 [file 23292887]
